# Supplementary material for: Controlling miRNA-like off-target effects of an siRNA with nucleobase modifications
Source: Royal Society of Chemistry journal article supplement (doi:10.1039/c7ob02654d), 2017-01-01
Supplement: c7ob02654d1.pdf [file c7ob02654d1.pdf]

Supporting information:

## Controlling miRNA-like Off-target Effects of an siRNA with Nucleobase Modifications

Scott R. Suter<sup>1</sup>, Alexi Ball-Jones<sup>1</sup>, Madeline M. Mumbleau<sup>1</sup>, Rachel Valenzuela<sup>1</sup>, Jose Ibarra-Soza<sup>1</sup>, Hassan Owens<sup>1</sup>, Andrew J. Fisher<sup>1,2</sup> and Peter A. Beal<sup>1</sup> \*

<sup>1</sup>Department of Chemistry, and <sup>2</sup>Department of Molecular and Cellular Biology, University of California, Davis, One Shields Ave, Davis, California (USA) 95616

### Contents of Supporting Information:

|                                                                           |     |
|---------------------------------------------------------------------------|-----|
| <u>Table S1</u> .....                                                     | S2  |
| <u>Table S2</u> .....                                                     | S3  |
| <u>Figure S1</u> .....                                                    | S4  |
| <u>Figure S2</u> .....                                                    | S5  |
| <u>Figure S3</u> .....                                                    | S6  |
| <u><sup>1</sup>HNMR of 1-(4-azidobenzyl) pyridin-1-ium bromide</u> .....  | S7  |
| <u><sup>13</sup>CNMR of 1-(4-azidobenzyl) pyridin-1-ium bromide</u> ..... | S8  |
| <u>ESI-HRMS of 1-(4-azidobenzyl) pyridin-1-ium bromide</u> .....          | S9  |
| <u>Supplementary References</u> .....                                     | S10 |

Table S1: Data Collection, Phasing, and Refinement Statistics

|                                     | Br <sup>-</sup><br>peak                          | Br <sup>-</sup><br>remote                        | <b>“High Resolution”</b>                         |
|-------------------------------------|--------------------------------------------------|--------------------------------------------------|--------------------------------------------------|
| X-Ray source                        | ALS 8.3.1                                        | ALS 8.3.1                                        | ALS 8.3.1                                        |
| Wavelength                          | 0.92025 Å                                        | 0.91157 Å                                        | 1.11583 Å                                        |
| Space Group                         | C2                                               | C2                                               | C2                                               |
| Unit Cell Parameters                | a=74.74 Å<br>b=43.16 Å<br>c=48.88 Å<br>β=120.64° | a=74.75 Å<br>b=43.16 Å<br>c=48.88 Å<br>β=120.64° | a=74.64 Å<br>b=43.15 Å<br>c=48.98 Å<br>β=120.46° |
| Resolution                          | 1.75Å<br>(1.78-1.75Å)                            | 1.75Å<br>(1.78-1.75Å)                            | 1.65 Å<br>(1.69-1.65 Å)                          |
| Number of reflections               | 359,400 (19,161)                                 | 358,539 (19,163)                                 | 93,686 (3,083)                                   |
| Number Unique                       | 13,619 (704)                                     | 13,630 (705)                                     | 15,214 (695)                                     |
| Completeness (%)                    | 99.9 (99.6)                                      | 99.9 (99.6)                                      | 92.9 (57.4)                                      |
| Multiplicity                        | 26.4 (27.2)                                      | 26.3 (27.2)                                      | 6.2 (4.4)                                        |
| Mean I/σ(I)                         | 21.4 (2.6)                                       | 21.3 (2.4)                                       | 22.5 (3.3)                                       |
| R <sub>merge</sub> <sup>a</sup> (%) | 5.3 (139.2)                                      | 5.3 (145.5)                                      | 2.8 (21.8)                                       |
| Anomalous Completeness              | 99.9 (99.6)                                      | 99.9 (99.6)                                      |                                                  |
| Anomalous Multiplicity              | 13.5 (13.5)                                      | 13.4 (13.8)                                      |                                                  |
| Initial Figure of Merit             |                                                  | 0.38                                             |                                                  |
| Density Modified Figure of Merit    |                                                  | 0.86                                             |                                                  |
| <b><u>Refinement Statistics</u></b> |                                                  |                                                  |                                                  |
| Resolution (Å)                      |                                                  |                                                  | 50-1.65                                          |
| R-factor <sup>b</sup>               |                                                  |                                                  | 0.2167                                           |
| R-free <sup>b</sup>                 |                                                  |                                                  | 0.2558                                           |
| RMS Bond Length (Å)                 |                                                  |                                                  | 0.004                                            |
| RMS Bond Angles (°)                 |                                                  |                                                  | 1.97                                             |
| Overall B Value (Å <sup>2</sup> )   |                                                  |                                                  | 59.8                                             |
| PDBID                               |                                                  |                                                  | 6BGB                                             |

<sup>a</sup> R<sub>merge</sub> =  $[\sum_h \sum_i |I_h - I_{hi}| / \sum_h \sum_i I_{hi}]$  where  $I_h$  is the mean of  $I_{hi}$  observations of reflection  $h$ . Numbers in parenthesis represent highest resolution shell.

<sup>b</sup> R-factor and  $R_{free} = \sum ||F_{obs}| - |F_{calc}|| / \sum |F_{obs}| \times 100$  for 95% of recorded data (R-factor) or 5% of data ( $R_{free}$ ). Numbers in parenthesis represent highest resolution shell.

Table S2: Mass Spectrometry Data for Modified RNAs

| <b>16mer crystallization triazoles (5'-GCAGXCUUAAGUCUGC-3')</b>   |                   |                 |
|-------------------------------------------------------------------|-------------------|-----------------|
|                                                                   | <u>Calculated</u> | <u>Observed</u> |
| <b>BrPh:</b>                                                      | 5301.0            | 5303.8          |
| <b>12mer TM triazoles (5'-CAUUA<del>X</del>GGUGGG-3')</b>         |                   |                 |
|                                                                   | <u>Calculated</u> | <u>Observed</u> |
| <b>PyrBn:</b>                                                     | 4109.4            | 4110.8          |
| <b>NH<sub>2</sub>Bn:</b>                                          | 4046.4            | 4048.3          |
| <b>Pyr:</b>                                                       | 4018.4            | 4020.3          |
| <b>BrPh:</b>                                                      | 4095.3            | 4098.2          |
| <b>21 mer PIK3CB g6 triazoles (5'-p-AUAGGXUUCAUAUUAGGAGAU-3')</b> |                   |                 |
|                                                                   | <u>Calculated</u> | <u>Observed</u> |
| <b>PyrBn:</b>                                                     | 7076.1            | 7080.1          |
| <b>NH<sub>2</sub>Bn:</b>                                          | 7013.1            | 7005.9          |
| <b>Pyr:</b>                                                       | 6985.1            | 6980.6          |
| <b>BrPh:</b>                                                      | 7061.9            | 7060.7          |

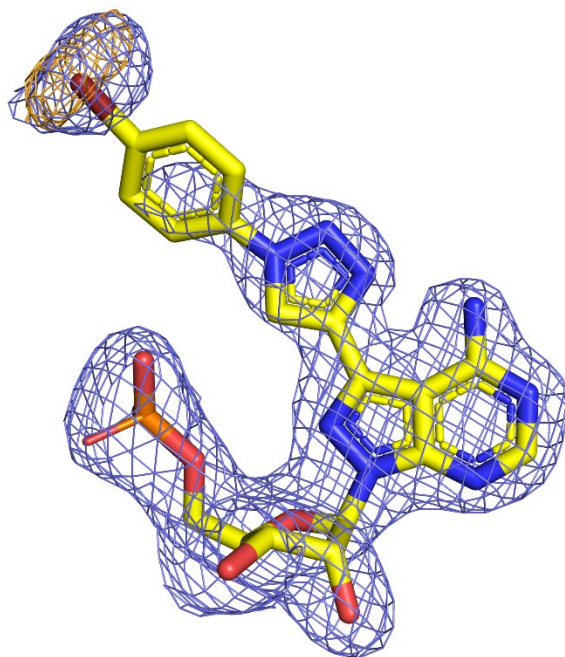

**Figure S1:** The overlaid 2Fo-Fc electron density (blue) for the 16 mer BrPh triazole modification at  $6\sigma$ , along with the anomalous difference electron density (orange) confirming location of bromine atom.

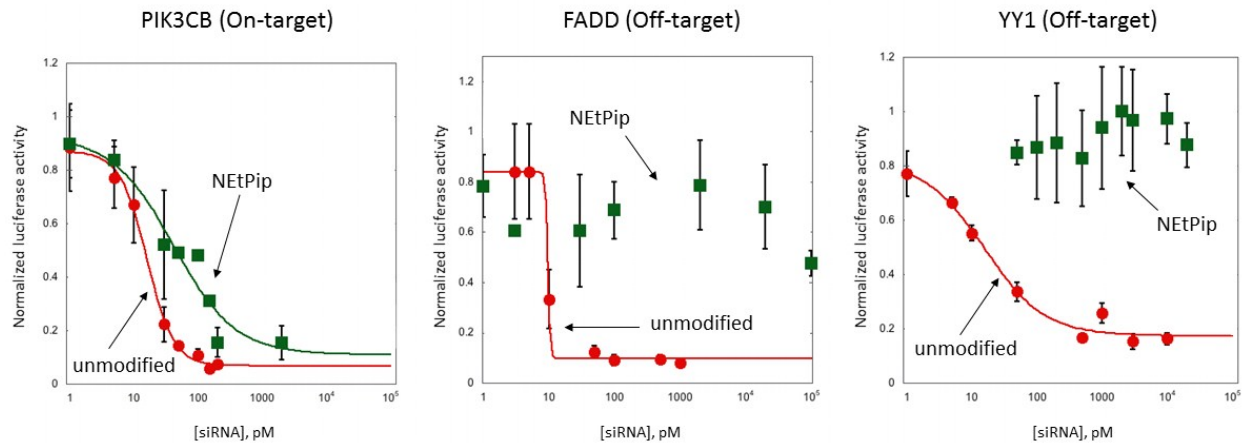

**Figure S2:** Dual Luciferase Assay  $IC_{50}$  data for the NETPip g6 modified PIK3CB siRNA compared to the unmodified guide strand. For PIK3CB on-target knockdown ( $IC_{50} = 15 \pm 5$  pM (unmodified);  $IC_{50} = 44 \pm 18$  pM (modified)). For FADD off-target knockdown ( $IC_{50} = 8 \pm 3$  pM (unmodified)). For YY1 off-target knockdown  $IC_{50} = 15 \pm 5$  pM (unmodified). No measurable  $IC_{50}$  could be measured for FADD or YY1 when the siRNA was modified at position 6 with NETPip.

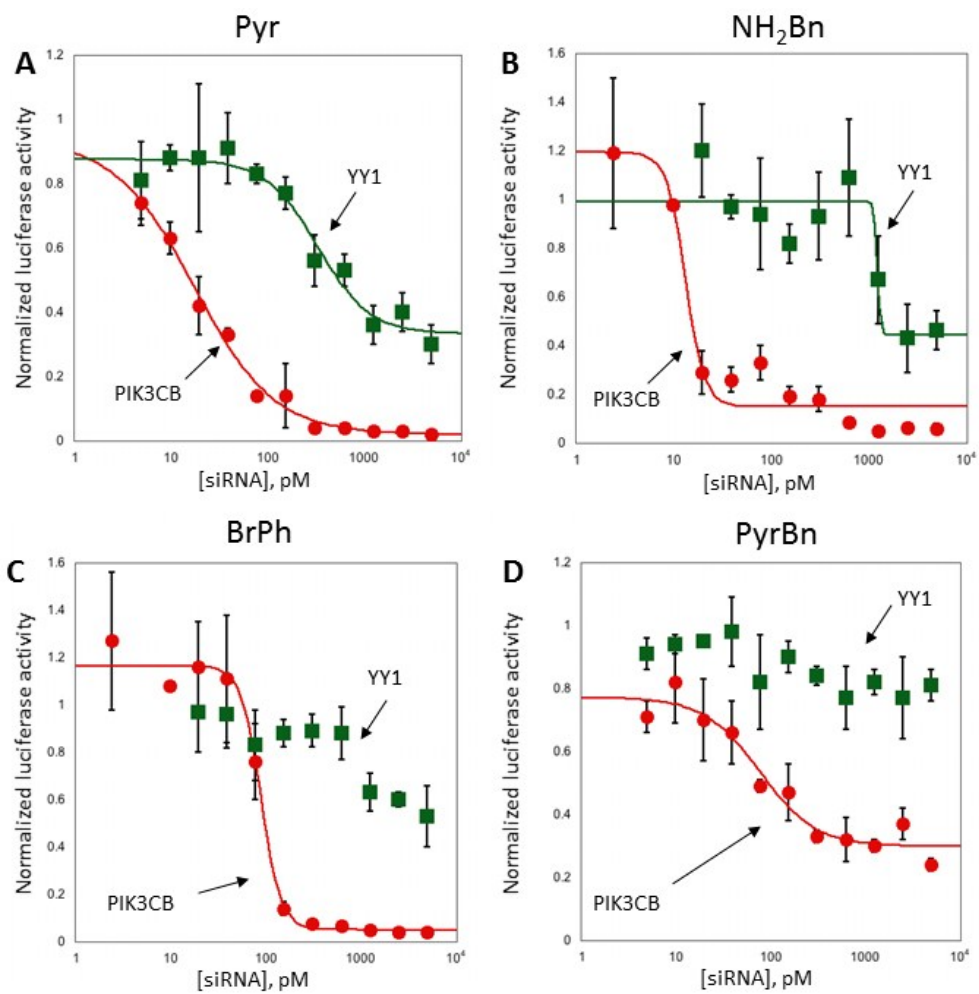

**Figure S3** Luciferase assay IC<sub>50</sub> curves for the Pyr (A), NH<sub>2</sub>Bn (B), BrPh (C), and PyrBn (D) guide position 6 modifications against the PIK3CB on-target (red) and YY1 off-target (green) sequences. All measurable IC<sub>50</sub> data can be found in the main text in Table 1. All IC<sub>50</sub> measurements were carried out to 5 nM.

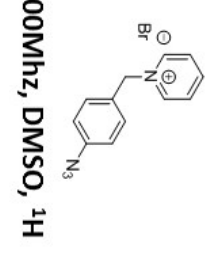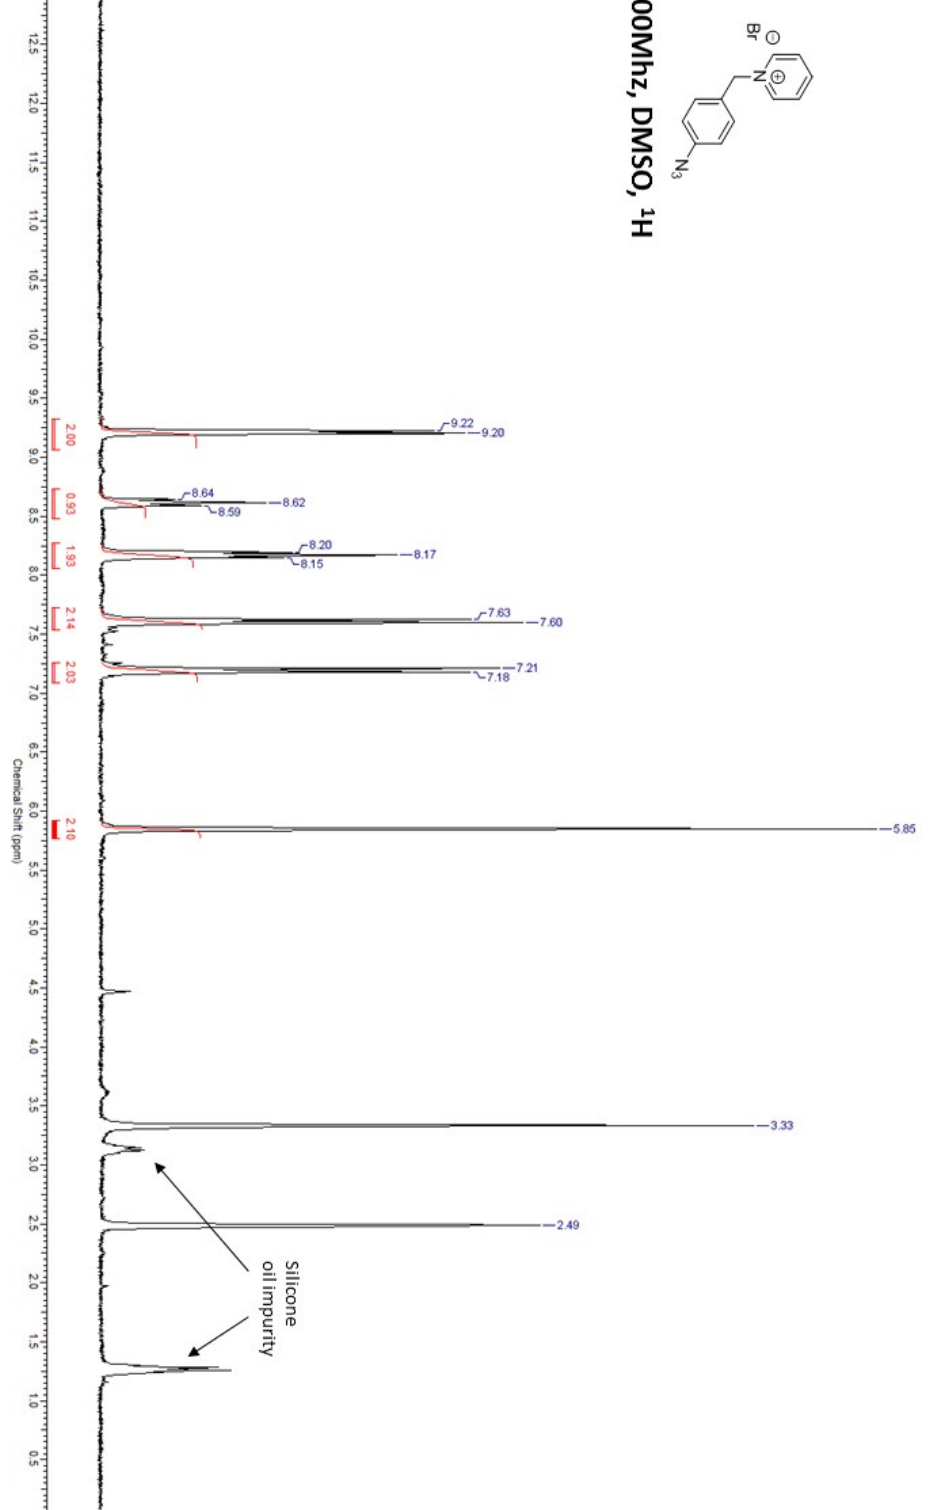

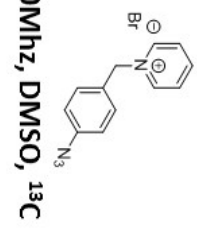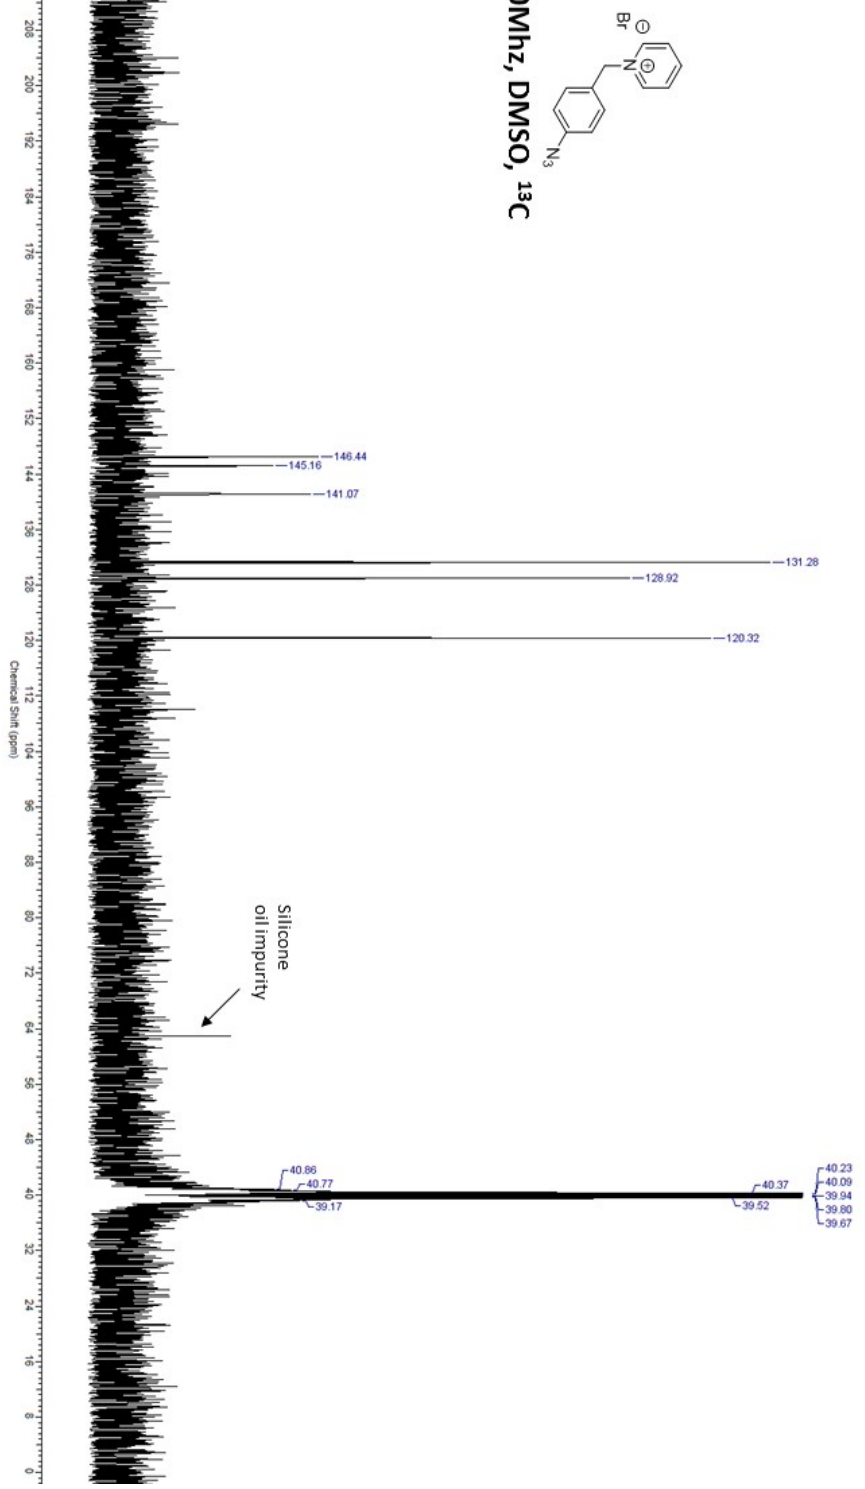



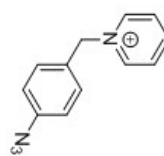

Theoretical mass = 211.0978 Da

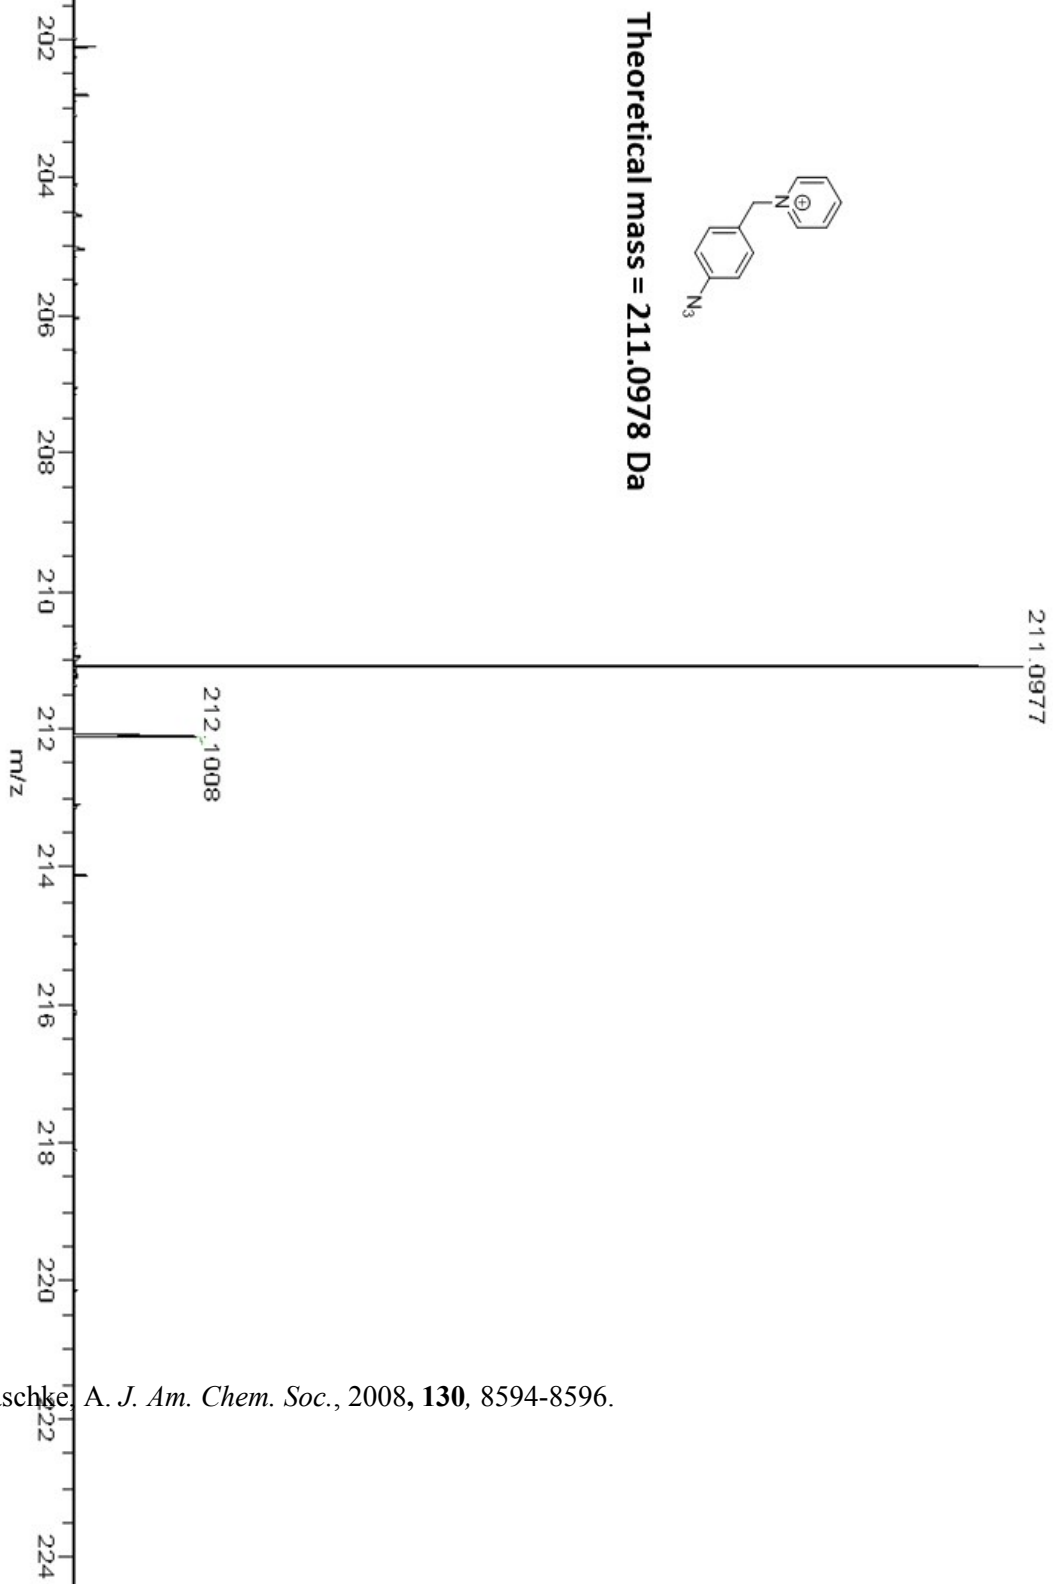

### Reference

- (1) Wombacher, R.; Jaschke, A. *J. Am. Chem. Soc.*, 2008, **130**, 8594-8596.
